# Supplementary material for: Co3O4nanoparticles embedded in porous carbon nanofibers enable efficient nitrate reduction to ammonia
Source: Royal Society of Chemistry journal article supplement (doi:10.1039/d3cc02023a), 2023-01-01
Supplement: d3cc02023a1.pdf [file d3cc02023a1.pdf]

## Electronic Supplementary Information

### Experimental Section

**Materials:** All reagents used in this work are analytical grade. Cobalt nitrate hexahydrate ( $\text{Co}(\text{NO}_3)_2 \cdot 6\text{H}_2\text{O}$ ), hydrochloric acid (HCl), ammonium chloride ( $\text{NH}_4\text{Cl}$ ), Sulfuric acid ( $\text{H}_2\text{SO}_4$ ), were purchased from Kelong chemically (Chengdu, China). Polyvinyl alcohol (PVA,  $M_w = 67000$ ), Polytetrafluoroethylene (PTFE, 60 wt% of solid content), Sodium nitrate ( $\text{NaNO}_3$ ), sodium nitrite ( $\text{NaNO}_2$ ), sodium nitroferricyanide dihydrate ( $\text{C}_5\text{FeN}_6\text{Na}_2\text{O} \cdot 2\text{H}_2\text{O}$ ), sodium salicylate ( $\text{C}_7\text{H}_5\text{NaO}_3$ ), salicylic acid ( $\text{C}_7\text{H}_6\text{O}_3$ ), trisodium citrate dihydrate ( $\text{C}_6\text{H}_5\text{Na}_3\text{O}_7 \cdot 2\text{H}_2\text{O}$ ), sodium hypochlorite solution (NaClO), pp-dimethylamino benzaldehyde ( $\text{C}_9\text{H}_{11}\text{NO}$ ), 0.8 wt% sulfamic acid solution ( $\text{H}_3\text{NO}_3\text{S}$ ), were purchased from Aladdin Ltd (Shanghai, China). Nafion solution (5 wt%) was purchased from Sigma-Aldrich Chemical Reagent Co., and Ltd. Deionized water was purified through a Millipore system.

**Preparation of catalysts:**  $\text{Co}_3\text{O}_4@\text{CNF}$  was prepared by the electrospinning method. Firstly, 0.1 g of  $\text{Co}(\text{NO}_3)_2 \cdot 6\text{H}_2\text{O}$ , 1.5 g of PVA were dissolved in 10 mL of water under vigorous stirring at 90 °C for 180 min. 10 g of PTFE was then added into the solution. Subsequently, the prepared solution was moved to a syringe with a stainless-steel nozzle. A high-voltage of 22 kV was supplied and the distance between the needle tip and the rotating drum collector is 22 cm. After electrospinning, the as-spun fibres were collected and heat-treated at 280 °C for 2 h in air.  $\text{Co}@\text{CNF}$  was

formed by carbonized the fiber at 800 °C for 2 h in Ar atmosphere. Co<sub>3</sub>O<sub>4</sub>@CNF was synthesized by oxidizing the Co@CNF in air at 300 °C for 2 h. CNF was prepared under the same conditions with Co@CNF without adding Co(NO<sub>3</sub>)<sub>2</sub>·6H<sub>2</sub>O.

**Working electrode preparation:** 5 mg catalyst were grinded into powder and added into a mixed solution containing 655 μL ethanol, 325 μL deionized water and 20 μL of 5 wt% Nafion solution, followed by 60 min ultrasonic dispersion to form a homogeneous suspension. Then, 20 μL of such suspension was dropped on carbon paper (CP, 1×1 cm<sup>2</sup>), and dried at ambient temperature.

**Characterizations:** XRD data were acquired by a LabX XRD-6100 X-ray diffractometer with a Cu Kα radiation (40 kV, 30 mA). SEM measurements were carried out on a Gemini SEM 300 scanning electron microscope (ZEISS, Germany) at an accelerating voltage of 5 kV. TEM image was obtained from a Titan G260-300 transmission electron microscope operated at 200 kV. XPS measurements were performed on a Thermo Scientific K-Alpha photoelectron spectrometer. The absorbance data was collected on on SHIMADZU UV-1800 Ultraviolet-visible (UV-Vis) spectrophotometer. Gas was determined using Shimadzu gas chromatography (GC) (GC-2014). Ion chromatography data were acquired by ion chromatograph (Thermo Scientific ICS-900).

**Electrochemical measurements:** All electrochemical measurements were carried on the CHI660E electrochemical workstation (Shanghai, Chenhua) using a standard three-electrode setup. Electrolyte solution was Ar-saturated of 0.1 M NaOH with 0.1 M NO<sub>3</sub><sup>-</sup>, using Co<sub>3</sub>O<sub>4</sub>@CNF (loading 0.1 mg) as working electrode, a Pt plate as the

counter electrode, and a Hg/HgO as the reference electrode. We use a H-type electrolytic cell separated by a Nafion 117 membrane which was protonated by boiling in ultrapure water, H<sub>2</sub>O<sub>2</sub> (5%) aqueous solution and 0.5 M H<sub>2</sub>SO<sub>4</sub> at 80 °C for another 2 h, respectively. All the potentials reported in our work were converted to reversible hydrogen electrode via calibration with the following equation: E (RHE) = E (Hg/HgO) + (0.098 + 0.0591 × pH) V.

**Determination of NH<sub>3</sub>:** The NH<sub>3</sub> concentration in the electrolyte was determined by colorimetry using the indophenol blue method. The post-electrolytes using Co<sub>3</sub>O<sub>4</sub>@CNF as work electrode are diluted 40 times before testing. The post-electrolytes using Co@CNF as work electrode are diluted 10 times before testing. The post-electrolyte using CNF as work electrode – 0.9 V is only diluted 1 time before testing. In detail, 2 mL of the solution after reaction, and 2 mL of 1 M NaOH coloring solution containing 5% salicylic acid and 5% sodium citrate. Then, 1 mL oxidizing solution of 0.05 M NaClO and 0.2 mL catalyst solution of C<sub>5</sub>FeN<sub>6</sub>Na<sub>2</sub>O (1 wt%) were added to the above solution. After standing in the dark for 2 h, the UV-Vis absorption spectra were measured. The concentration of NH<sub>3</sub> was identified using the absorbance at a wavelength of 655 nm. The concentration-absorbance curve was calibrated using the standard NH<sub>4</sub>Cl solution in 0.1 M NaOH solution. The fitting curve ( $y = 0.51697x + 0.0365$ ,  $R^2 = 0.999$ ) shows good linear relation of absorbance value with NH<sub>3</sub> concentration.

**Detection of NO<sub>2</sub><sup>-</sup>:** The concentration of NO<sub>2</sub><sup>-</sup> was quantitatively analyzed by the Griess method. The obtained electrolyte was diluted 10 times. Firstly, the coloring

reagent for  $\text{NO}_2^-$  was prepared as follow: 0.1 g of N-(1-naphthyl)-ethylenediamine dihydrochloride, 1.0 g of sulfonamide and 2.94 mL of  $\text{H}_3\text{PO}_4$  were dissolved in 50 mL of deionized water. Next, 40  $\mu\text{L}$  catholyte was diluted to 2 mL and 1 mL of diluted solution was mixed with 1 mL of coloring reagent and 2 mL of deionized water. After shaking and standing for 10 minutes, the UV-Vis spectrophotometry was used to measure the absorbance at a wavelength of 540 nm. The concentration of  $\text{NO}_2^-$  was calculated based on the calibration curve ( $y = 0.22406x + 0.02224$ ,  $R^2 = 0.999$ ).

**Determination of  $\text{N}_2\text{H}_4$ :** The Watt and Chrisp method are adopted to detect  $\text{N}_2\text{H}_4$  in the electrolyte. In details,  $\text{C}_9\text{H}_{11}\text{NO}$  (5.99 g),  $\text{HCl}$  (30 ml) and  $\text{C}_2\text{H}_5\text{OH}$  (300 mL) are mixed to form an uniform solution used as a color reagent. Then, 1 mL of color reagent is added into 1 mL of electrolyte after 1 h electrolysis. The absorbance is performed at a wavelength of 455 nm after the mixture stands 20 min in darkness. The fitting curve ( $y = 0.3263x + 0.06524$ ,  $R^2 = 0.998$ ) shows a good linear relation of absorbance value with  $\text{N}_2\text{H}_4$  concentration.

**Detection of  $\text{H}_2$ :** In the NITRR process, there is a competitive reaction HER in cathode.  $\text{H}_2$  can be detected by blowing the product after electrolysis in the cathode chamber into a gas chromatograph (GC). In order to reduce the experimental error caused by the different thermal conductivity of the gas, the carrier gas of the chromatography is nitrogen. Nitrogen is passed into the cathode electrolyte at a flowing rate of  $20 \text{ mL min}^{-1}$ , and GC collected the gas produced by the reaction in the cathode chamber every 5 minutes. The hydrogen concentration can be obtained by integrating the characteristic peaks of hydrogen collected in the TCD detector.

### Calculations of the FE and NH<sub>3</sub> yield rate:

FE toward NH<sub>3</sub> via NITRR was calculated by the following equation:

$$FE = (8 \times F \times [\text{NH}_3] \times V) / (17 \times Q) \times 100\%$$

NH<sub>3</sub> yield rate is calculated using the following equation:

$$\text{NH}_3 \text{ yield} = ([\text{NH}_3] \times V) / (t \times m_{\text{cat.}})$$

Where F is the Faradaic constant (96480 C mol<sup>-1</sup>), [NH<sub>3</sub>] is the measured NH<sub>3</sub> concentration, V is the volume of electrolyte in the cathode compartment (40 mL), 17 is the molar mass of NH<sub>3</sub>, Q is the total quantity of applied electricity; t is the electrolysis time and m<sub>cat.</sub> is the mass of catalyst (0.1 mg).

### DFT calculation details:

First-principles calculations were performed within the density functional theory framework.<sup>1</sup> The projector-augmented wave (PAW) method<sup>2, 3</sup> and the generalized gradient approximation (GGA)<sup>4</sup> for the exchange-correlation energy functional, as implemented in the Vienna ab initio simulation package (VASP)<sup>5-8</sup> were used. The GGA calculation was performed with the Perdew-Burke-Ernzerhof (PBE)<sup>9</sup> exchange-correlation potential. Considered long-range interaction between molecules/intermediates and surface, Van der Waals interactions were considered using DFT-D3 correlation.<sup>10</sup> The convergence criterion of geometry relaxation was set to 0.03 eV·Å<sup>-1</sup> in force on each atom. The energy cutoff for plane wave-basis was set to 600 eV. The K points were sampled with 3×3×1, 3×3×1, and 3×3×3 by Monkhorst-Pack method for Co (111), Co<sub>3</sub>O<sub>4</sub> (311), and Co<sub>3</sub>O<sub>4</sub> cluster, respectively.

The change in free energy ( $\Delta G$ ) of per reaction step was calculated as following:<sup>11</sup>

$$\Delta G = \Delta E + \Delta ZPE - T \cdot \Delta S + \Delta G_U + \Delta G_{\text{pH}}$$

Where  $\Delta E$  is the change of the total reaction energy obtained from DFT calculation,  $\Delta ZPE$  is the change of the zero-point energy,  $T$  is the temperature (300K), and  $\Delta S$  is the change of the entropy.  $\Delta G_U = -eU$ , where  $U$  is the potential at the electrode and  $e$  is the transferred charge.  $\Delta G_{pH} = k_B \cdot T \times \ln 10 \times \text{pH}$ , where  $k_B$  is the Boltzmann constant and  $T = 300$  K. In this work, the influence of pH was neglected.

For HER, the hydrogen adsorption energy ( $\Delta E_{H^*}$ ) was calculated by the following equation:<sup>12</sup>

$$\Delta E_{H^*} = E_{H^*} - (E_* + 1/2E_{H_2})$$

Where  $E_{H^*}$  is the total energy of H atom on the support,  $E_*$  is the total energy of support,  $E_{H_2}$  is the energy of the gas  $H_2$  calculated by setting the isolated  $H_2$  in a box of  $10.0 \text{ \AA} \times 10.0 \text{ \AA} \times 10.0 \text{ \AA}$ . The Gibbs free energy for the well-known highly efficient Pt catalyst is near-zero as  $|\Delta G_{\text{ads}}| \approx 0.09 \text{ eV}$ .<sup>13</sup>

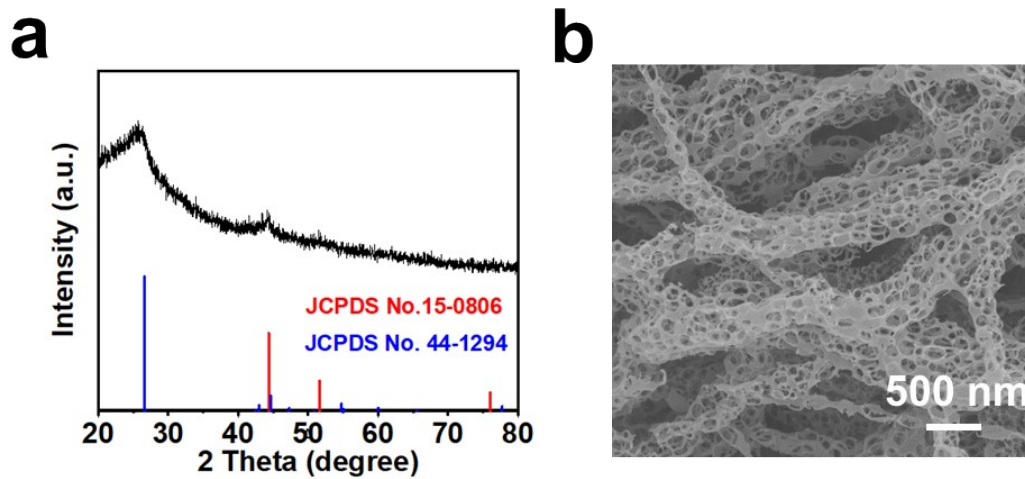

Fig. S1 (a) XRD pattern and (b) SEM image of Co@CNF.

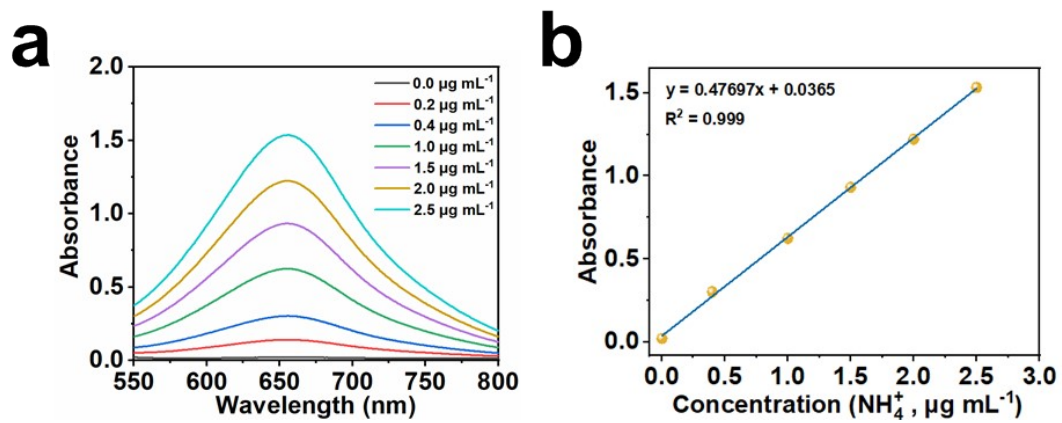

**Fig. S2** (a) UV-Vis absorption spectra and (b) corresponding calibration curve of  $\text{NH}_4^+$ .



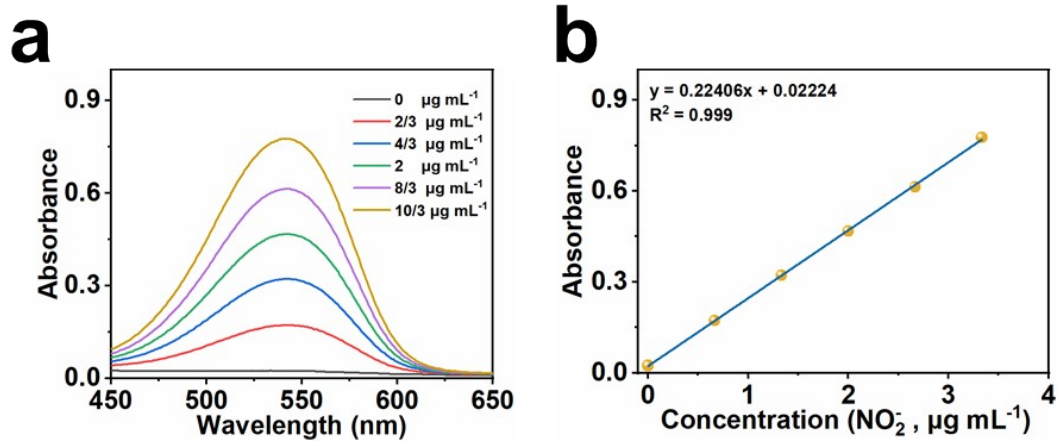

Fig. S3 (a) UV-Vis absorption spectra and (b) corresponding calibration curve of  $\text{NO}_2^-$ .

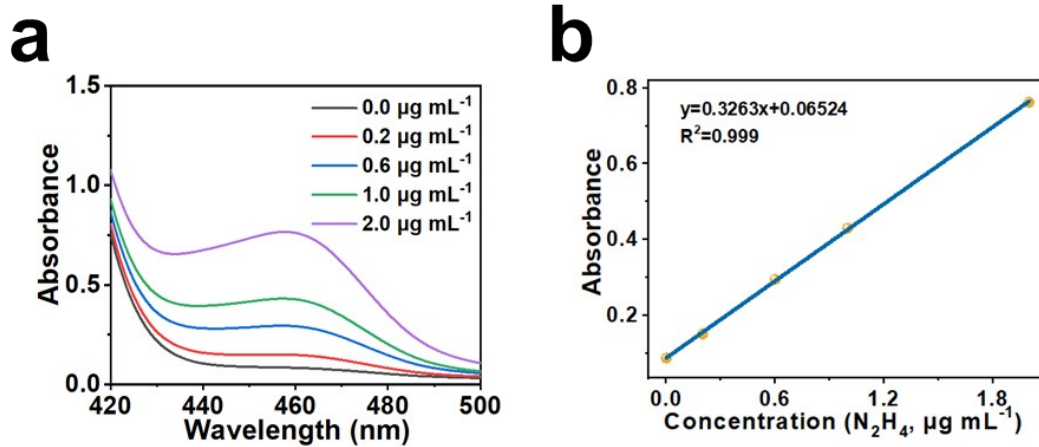

**Fig. S4** (a) UV-Vis absorption spectra and (b) corresponding calibration curve of  $N_2H_4$ .

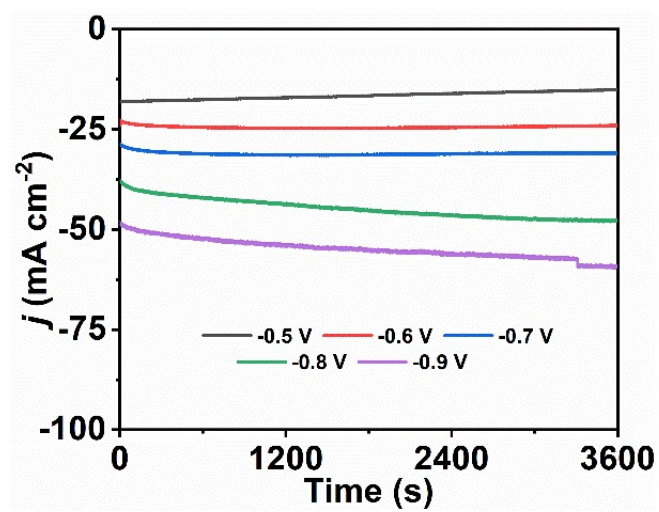

**Fig. S5** CA curves in 0.1 M NaOH solution with 0.1 M NO<sub>3</sub><sup>-</sup> at different applied potentials for 1 hour.

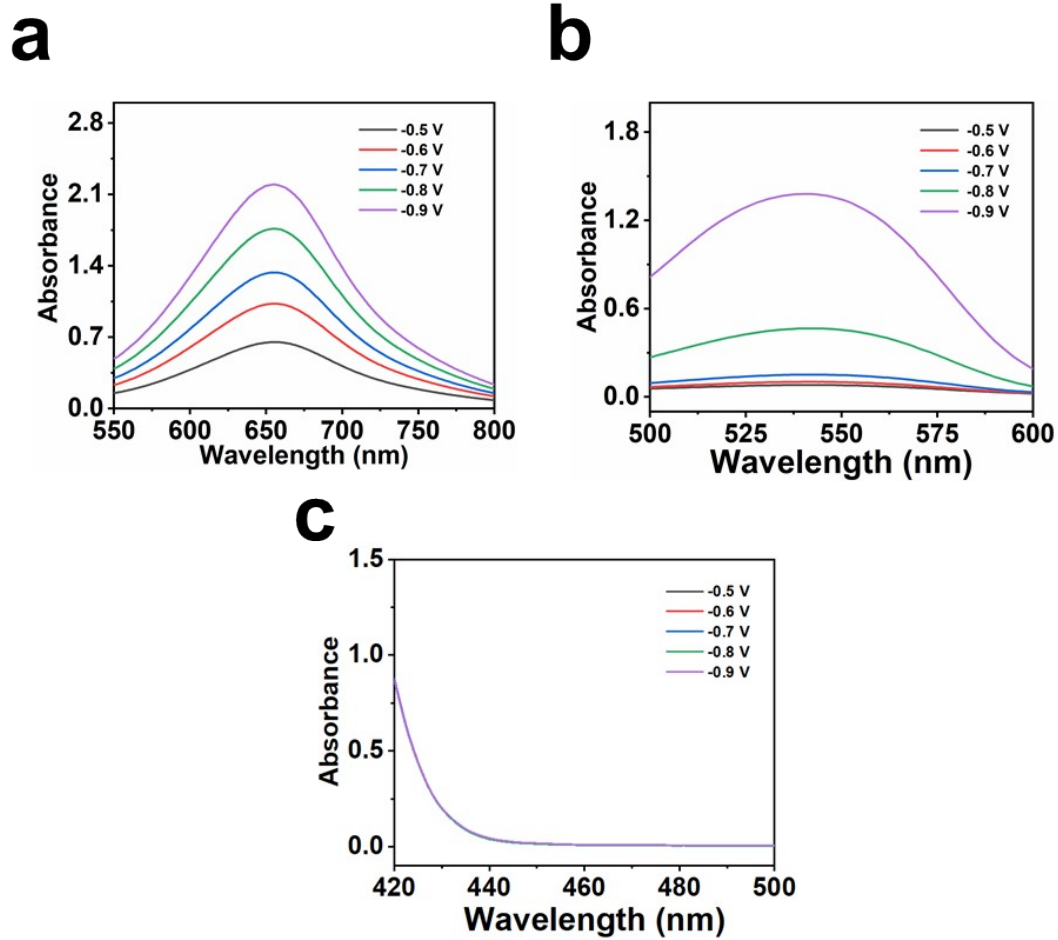

**Fig. S6** UV-Vis spectra of (a)  $\text{NH}_3$ , (b)  $\text{NO}_2^-$  and (c)  $\text{N}_2\text{H}_4$  on  $\text{Co}_3\text{O}_4@\text{CNF}$  electrode after 1 h electrolysis at different potentials.

**a**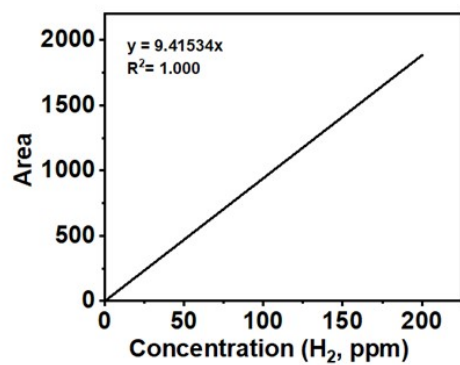**b**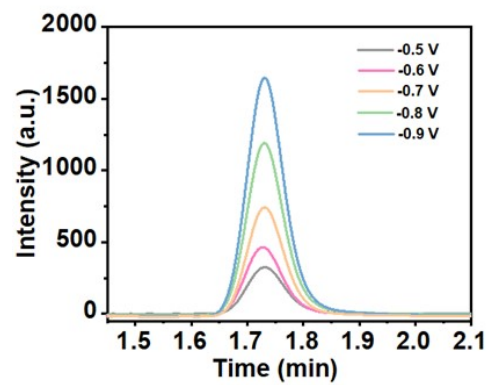

**Fig. S7** (a) The standard curve for calculating the H<sub>2</sub> yield. (b) Signal intensity of H<sub>2</sub> detected by gas chromatography.

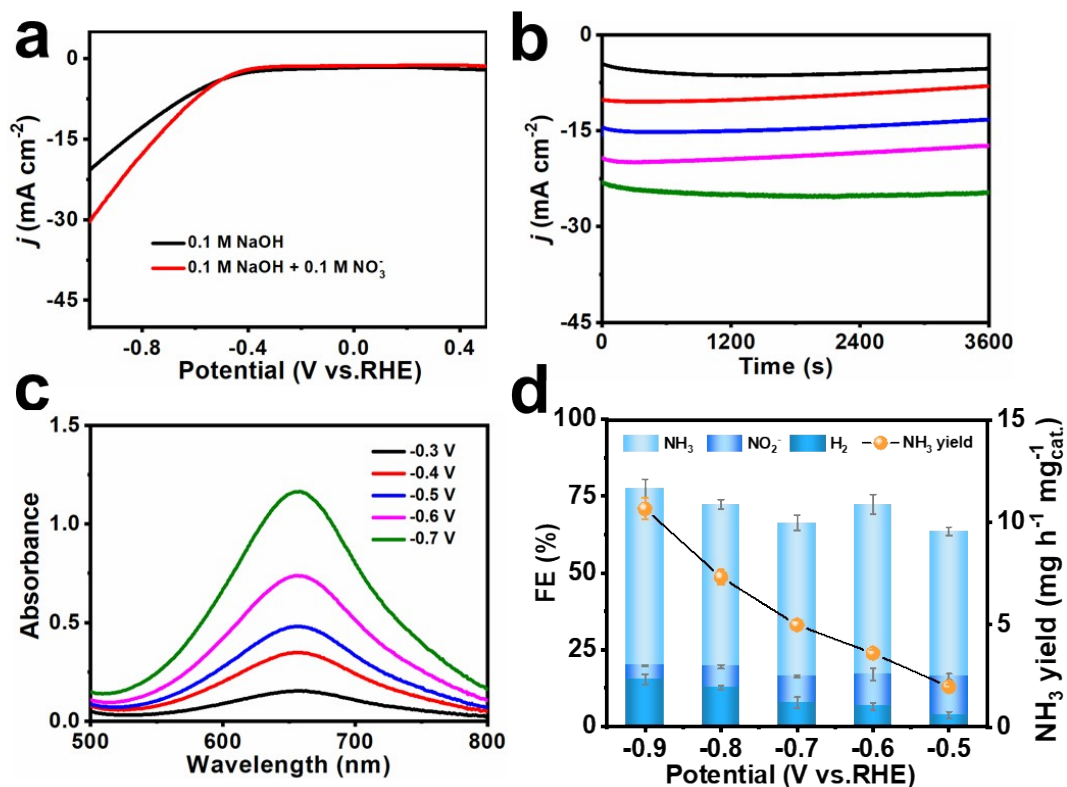

**Fig. S8** (a) LSV curves of Co@CNF in 0.1 M NaOH solution with and without  $\text{NO}_3^-$ . (b) CA curves in 0.1 M NaOH solution with 0.1 M  $\text{NO}_3^-$  at different applied potentials for 1 hour. (c) UV-Vis spectra of  $\text{NH}_3$  at different post-electrolysis electrolytes. (d) FEs of three reduction products and  $\text{NH}_3$  yields of Co@CNF at different potentials.

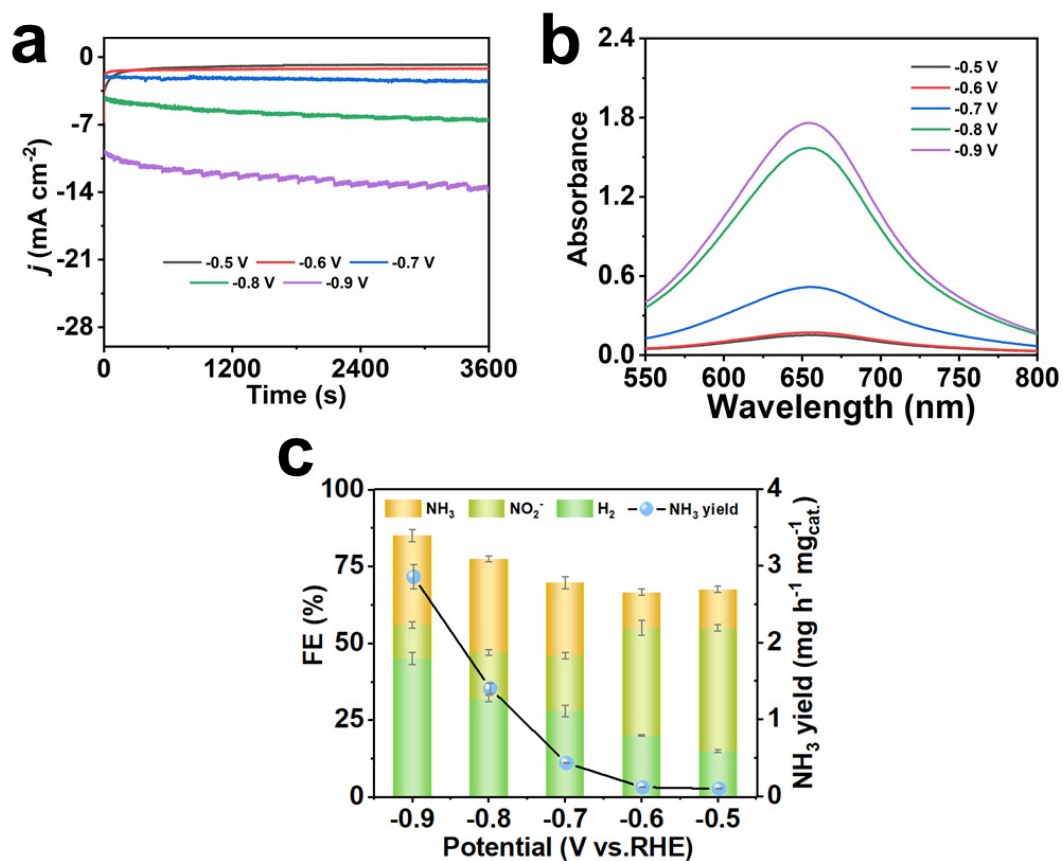

**Fig. S9** (a) CA curves in 0.1 M NaOH solution with 0.1 M NO<sub>3</sub><sup>-</sup> at different applied potentials for 1 hour. (b) UV-Vis spectra of NH<sub>3</sub> at different post-electrolysis electrolytes. (c) FEs of three reduction products and NH<sub>3</sub> yields at different potentials.

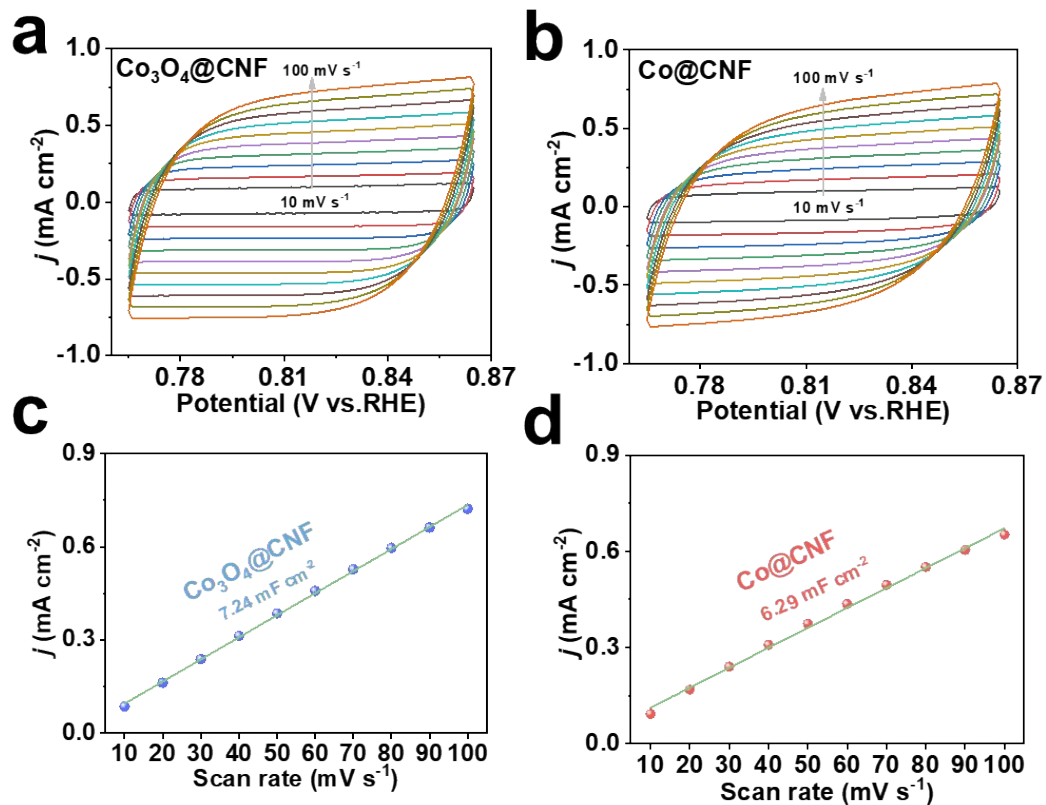

**Fig. S10** CV curves of (a)  $\text{Co}_3\text{O}_4@\text{CNF}$ , (b)  $\text{Co}@\text{CNF}$  with different scan rates from 10 to 100  $\text{mV s}^{-1}$ . Calculated double-layer capacitance of (c)  $\text{Co}_3\text{O}_4@\text{CNF}$  and (d)  $\text{Co}@\text{CNF}$ .



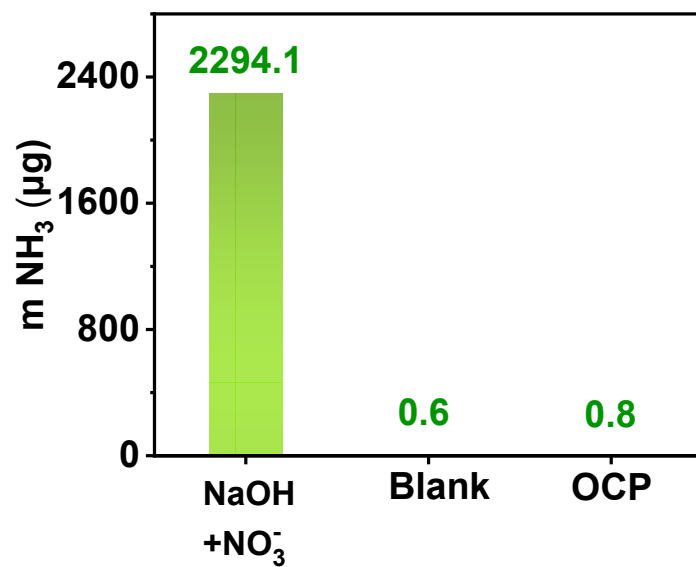

**Fig. S11** NH<sub>3</sub> yields of electrolysis at  $-0.7$  V in 0.1 M NaOH with 0.1 M NO<sub>3</sub><sup>-</sup>, blank pre-electrolysis electrolyte and electrolysis at open-circuit potential for 1 hour.

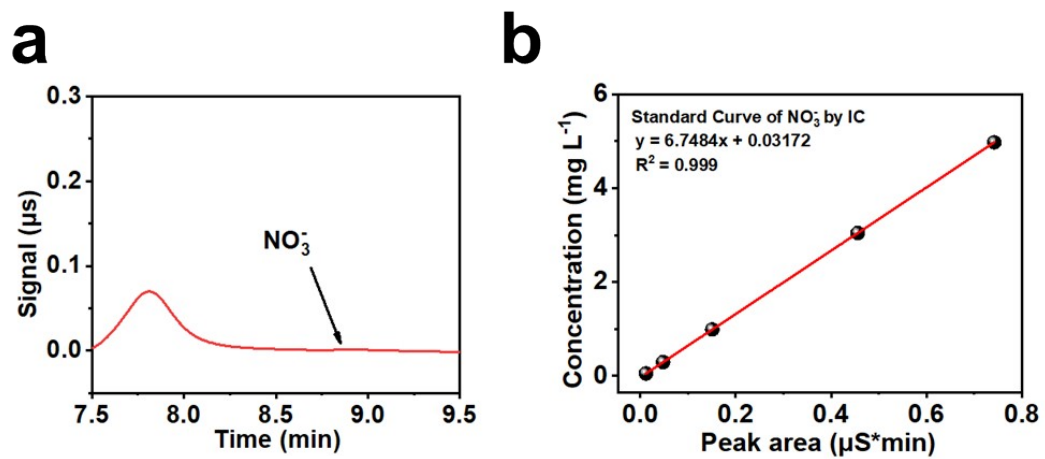

**Fig. S12** (a)  $\text{NO}_3^-$  concentration in 0.1 M NaOH detected by IC. (b) The standard curve of  $\text{NO}_3^-$ .

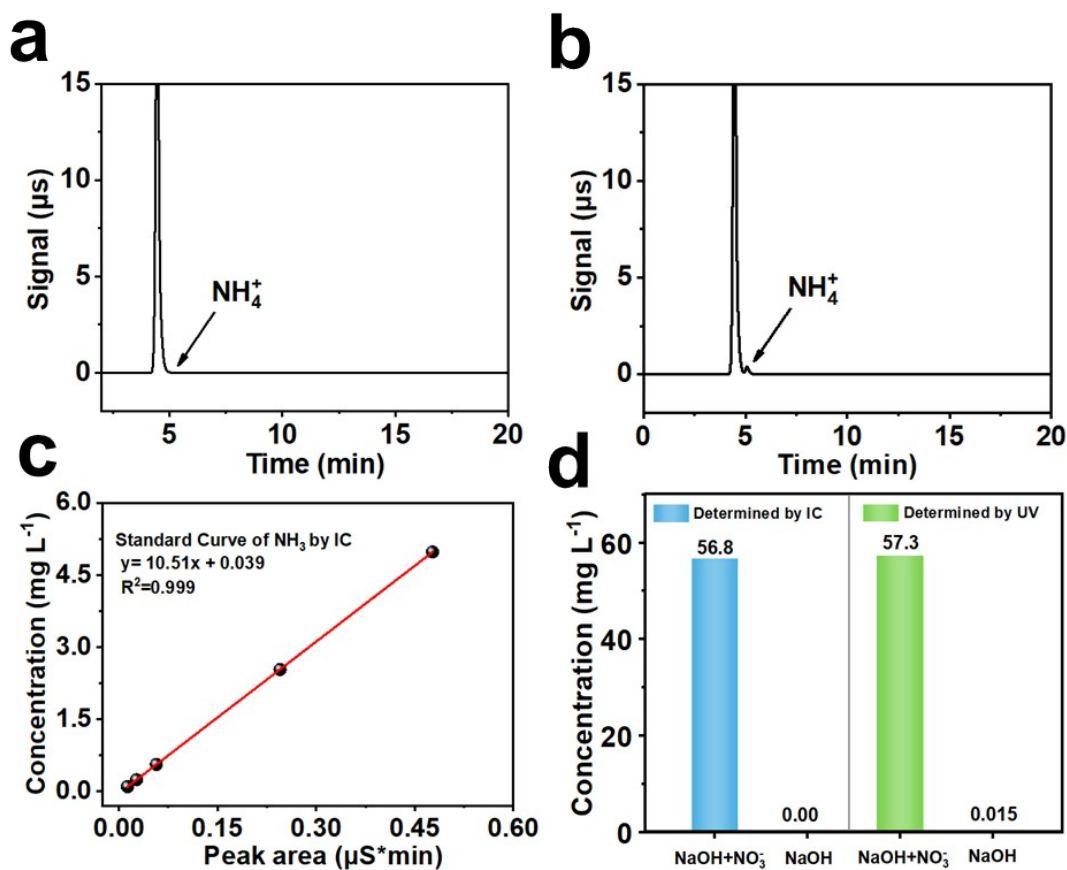

**Fig. S13** (a) IC curve of  $\text{Co}_3\text{O}_4@\text{CNF}$  in 0.1 N NaOH. (b) IC curve of  $\text{Co}_3\text{O}_4@\text{CNF}$  in 0.1 N NaOH with 0.1 M  $\text{NaNO}_3$ . (c) The standard curve for calculating the  $\text{NH}_3$  yield by IC. (d)  $\text{NH}_3$  yield detected by UV-Vis spectroscopy and IC.

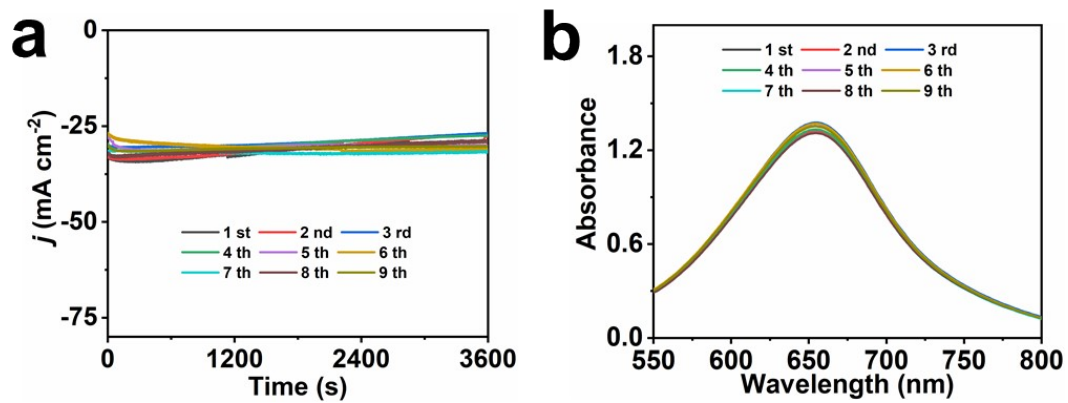

**Fig. S14** (a) CA curves in 0.1 M NaOH with 0.1 M NO<sub>3</sub><sup>-</sup> and (b) UV-Vis spectra of recycling test at -0.7 V.

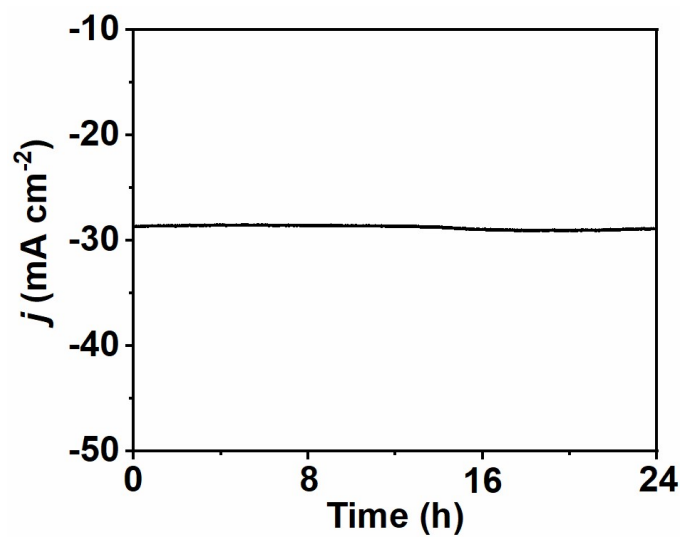

**Fig. S15** CA curve of 24 h electrolysis in 0.1 M NaOH with 0.1 M NO<sub>3</sub><sup>-</sup> on Co<sub>3</sub>O<sub>4</sub>@CNF electrode.

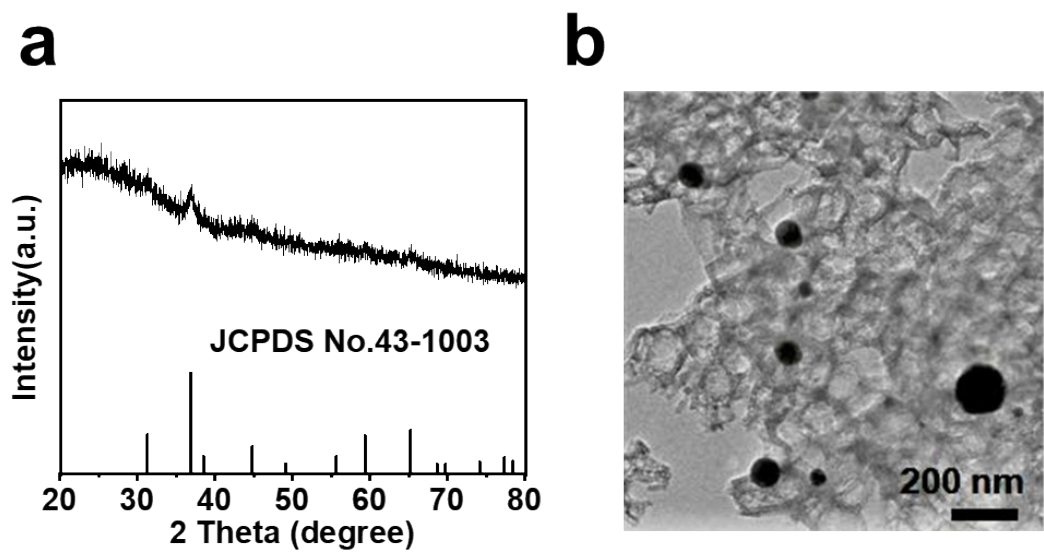

**Fig. S16** The XRD pattern and TEM image of  $\text{Co}_3\text{O}_4@\text{CNF}$  after testing.

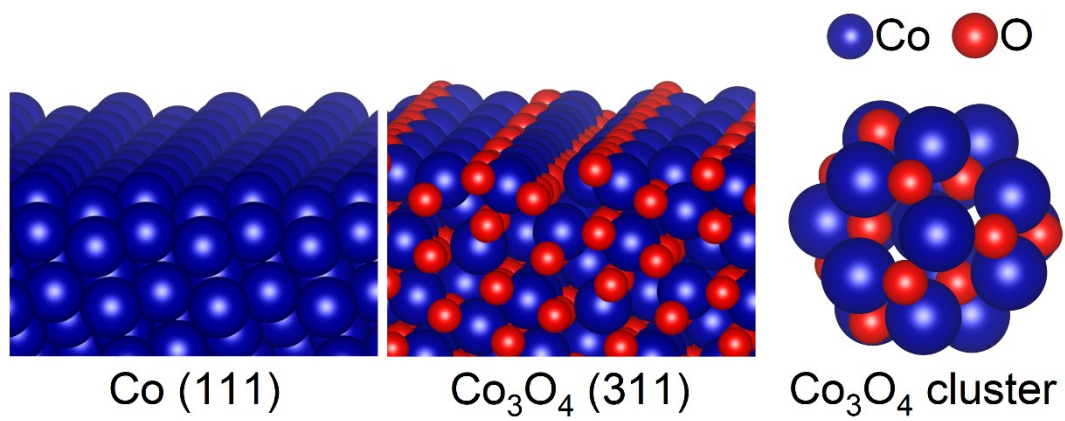

**Fig. S17** The calculated models of Co (111), Co<sub>3</sub>O<sub>4</sub> (311) and Co<sub>3</sub>O<sub>4</sub> cluster.

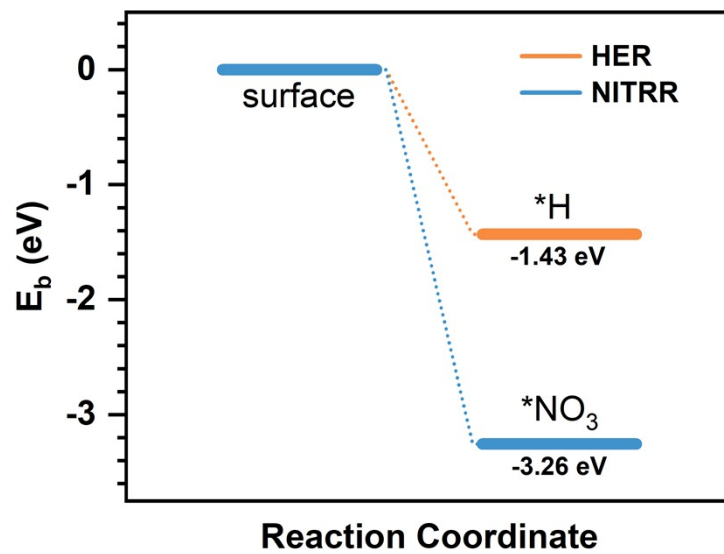

**Fig. S18** The calculated  $E_b$  of proton ( $*H$ ) and  $NO_3^-$  group ( $*NO_3$ ).



**Table S1** Comparison of performance for Co<sub>3</sub>O<sub>4</sub>@CNF with other reported NO<sub>3</sub>RR electrocatalysts.

| Catalysts                             | potential (V vs. RHE) | NH <sub>3</sub> yield (mg h <sup>-1</sup> mg <sup>-1</sup> <sub>cat.</sub> ) | FE (%) | Electrolyte                                                       | Ref.      |
|---------------------------------------|-----------------------|------------------------------------------------------------------------------|--------|-------------------------------------------------------------------|-----------|
| Co <sub>3</sub> O <sub>4</sub> @CNF   | -0.7                  | 20.36                                                                        | 94.4   | 0.1 M PBS + 0.1 M NaNO <sub>3</sub>                               | This work |
| Cu (111) nanodisks                    | -0.63                 | 2.16                                                                         | 81.11  | 0.1 M KOH + 0.01 M KNO <sub>3</sub>                               | 14        |
| PdNi nanosheets                       | -1.2                  | 16.7                                                                         | 87.9   | 0.5 M Na <sub>2</sub> SO <sub>4</sub> + 0.1 M NaNO <sub>3</sub>   | 15        |
| Ni <sub>3</sub> N/N-C-800 nanohybrids | -1.45                 | 11.71                                                                        | 85.0   | 0.5 M Na <sub>2</sub> SO <sub>4</sub> + 0.05 M NaNO <sub>3</sub>  | 16        |
| Pd nanodots on Zr-MOF                 | -1.3                  | 0.287                                                                        | 58.1   | 0.1 M Na <sub>2</sub> SO <sub>4</sub> + 500 ppm NaNO <sub>3</sub> | 17        |
| In-S-G                                | -0.7                  | 3.74                                                                         | 75.0   | 0.1 M KOH + 0.1 M KNO <sub>3</sub>                                | 18        |
| Fe single-atom catalysts              | -0.66                 | 20                                                                           | 76.0   | 0.1M K <sub>2</sub> SO <sub>4</sub> + 0.5 M KNO <sub>3</sub>      | 19        |
| Cu-N <sub>4</sub>                     | -0.89                 | 0.274                                                                        | 82.1   | 0.2 M Na <sub>2</sub> SO <sub>4</sub> + 0.2 M NaNO <sub>3</sub>   | 20        |
| Cu-Pd/C nanobelts                     | -0.4                  | 0.221                                                                        | 62.3   | 0.1 M KOH + 0.01 M KNO <sub>3</sub>                               | 21        |
| PP-Co/CP                              | -0.7                  | 18.7                                                                         | 90.1   | 0.1 M NaOH + 0.1 M NaNO <sub>3</sub>                              | 22        |
| Cu@ZrO <sub>2</sub>                   | -0.7                  | 15.4                                                                         | 67.6   | 0.1 M PBS + 0.1 M NaNO <sub>3</sub>                               | 23        |

## Reference

1. W. Kohn and L. J. Sham, *Phys. Rev.*, 1965, **140**, A1133-1138.
2. P. E. Blöchl, *Phys. Rev. B*, 1994, **50**, 17953.
3. G. Kresse and D. Joubert, *Phys. Rev. B*, 1999, **59**, 1758-1775.
4. J. P. Perdew and Y. Wang, *Phys. Rev. B*, 1992, **45**, 13244-13249.
5. G. Kresse and J. Hafner, *Phys. Rev. B*, 1993, **47**, 558-561.
6. G. Kresse and J. Furthmüller, *Phys. Rev. B*, 1996, **54**, 11169.
7. L. Chen, L. Z. Zhou, H. B. Lu, Y. Q. Zhou, J. L. Huang, J. Wang, Y. Wang, X. L. Yuan and Y. Yao, *Chem. Commun.*, 2020, **56**, 9138-9141.
8. G. Kresse and J. Furthmüller, *Comput. Mater. Sci.*, 1996, **6**, 15-50.
9. J. P. Perdew, K. Burke and M. Ernzerhof, *Phys. Rev. Lett.*, 1996, **77**, 3865-3868.
10. S. Grimme, J. Antony, S. Ehrlich and H. Krieg, *J. Chem. Phys.*, 2010, **132**, 154104.
11. J. K. Nørskov, J. Rossmeisl, A. Logadottir, L. Lindqvist, J. R. Kitchin, T. Bligaard and H. Jonsson, *J. Phys. Chem. B*, 2004, **108**, 17886-17892.
12. Y. Zheng, Y. Jiao, Y. H. Zhu, L. H. Li, Y. Han, Y. Chen, A. J. Du, M. Jaroniec and S. Z. Qiao, *Nat. Commun.*, 2014, **5**, 1-8.
13. J. K. Nørskov, T. Bligaard, A. Logadottir, J. Kitchin, J. G. Chen, S. Pandalov and U. Stimming, *J. Electrochem. Soc.*, 2005, **152**, J23-J26.
14. K. Wu, C. Sun, Z. Wang, Q. Song, X. Bai, X. Yu, Q. Li, Z. Wang, H. Zhang and J. Zhang, *ACS Mater. Lett.*, 2022, **4**, 650-656.
15. G. Zhang, X. Li, P. Shen, Y. Luo, X. Li and K. Chu, *J. Environ. Chem. Eng.*, 2022, **10**, 108362.

16. X. Zhang, G. Ma, L. Shui, G. Zhou and X. Wang, *Chem. Eng. J.*, 2022, **430**, 132666.
17. M. Jiang, J. Su, X. Song, P. Zhang, M. Zhu, L. Qin, Z. Tie, J.-L. Zuo and Z. Jin, *Nano Lett.*, 2022, **22**, 2529-2537.
18. F. Lei, W. Xu, J. Yu, K. Li, J. Xie, P. Hao, G. Cui and B. Tang, *Chem. Eng. J.*, 2021, **426**, 131317.
19. Z.-Y. Wu, M. Karamad, X. Yong, Q. Huang, D. A. Cullen, P. Zhu, C. Xia, Q. Xiao, M. Shakouri and F.-Y. Chen, *Nat. Commun.*, 2021, **12**, 2870.
20. J. Cheng, W. Sun, G. Dai, X. Yang, R. Xia, Y. Xu, X. Yang and W. Tu, *Fuel*, 2023, **332**, 126106.
21. Z. Wang, C. Sun, X. Bai, Z. Wang, X. Yu, X. Tong, Z. Wang, H. Zhang, H. Pang and L. Zhou, *ACS Appl. Mater. Interfaces*, 2022, **14**, 30969-30978.
22. Q. Chen, J. Liang, Q. Liu, K. Dong, L. Yue, P. Wei, Y. Luo, Q. Liu, N. Li and B. Tang, *Chem. Comm.*, 2022, **58**, 4259-4262.
23. J. Xia, H. Du, S. Dong, Y. Luo, Q. Liu, J. S. Chen, H. Guo and T. Li, *Chem. Comm.*, 2022, **58**, 13811-13814.
